# Supplementary material for: One-pot synthesis of 2,3-substituted benzo[b]thiophenes via Cu(i) catalysed intramolecular cyclisation from dithioesters
Source: Royal Society of Chemistry journal article supplement (doi:10.1039/c5ra02114f), 2015-01-01

## Supporting Information

### One-pot Synthesis of 2,3-Substituted Benzo[*b*]thiophenes via Cu(I) Catalysed Intramolecular Cyclisation from Dithioesters

*Nagarakere. C. Sandhya, Kebbahalli. N. Nandeesh, Kanuchugarakoppal S. Rangappa\* and Sannaiah. Ananda\**

Department of Studies in Chemistry

Manasagangothri, Mysore, University of Mysore, Mysuru-570006, INDIA

#### Contents:

1. The  $^1\text{H}$  and  $^{13}\text{C}$  NMR Spectra of **3 (a-p)** S2-S33

<sup>1</sup>H NMR of 3a

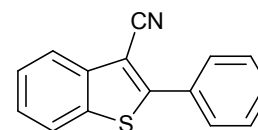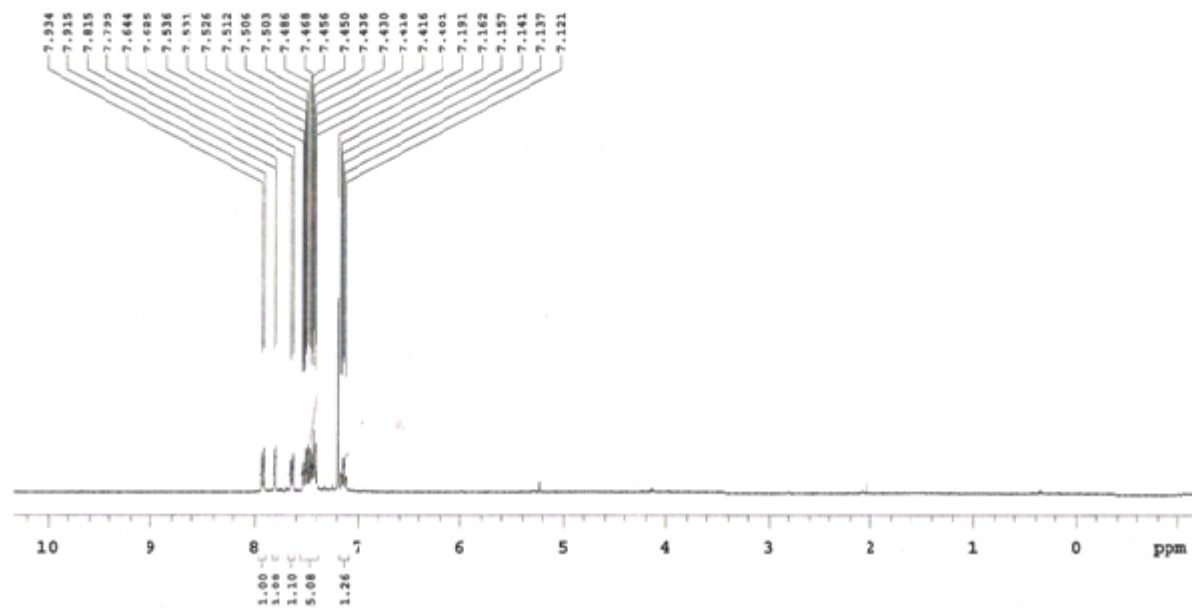

**<sup>13</sup>C NMR of 3a**

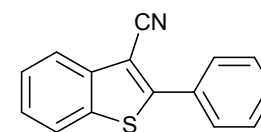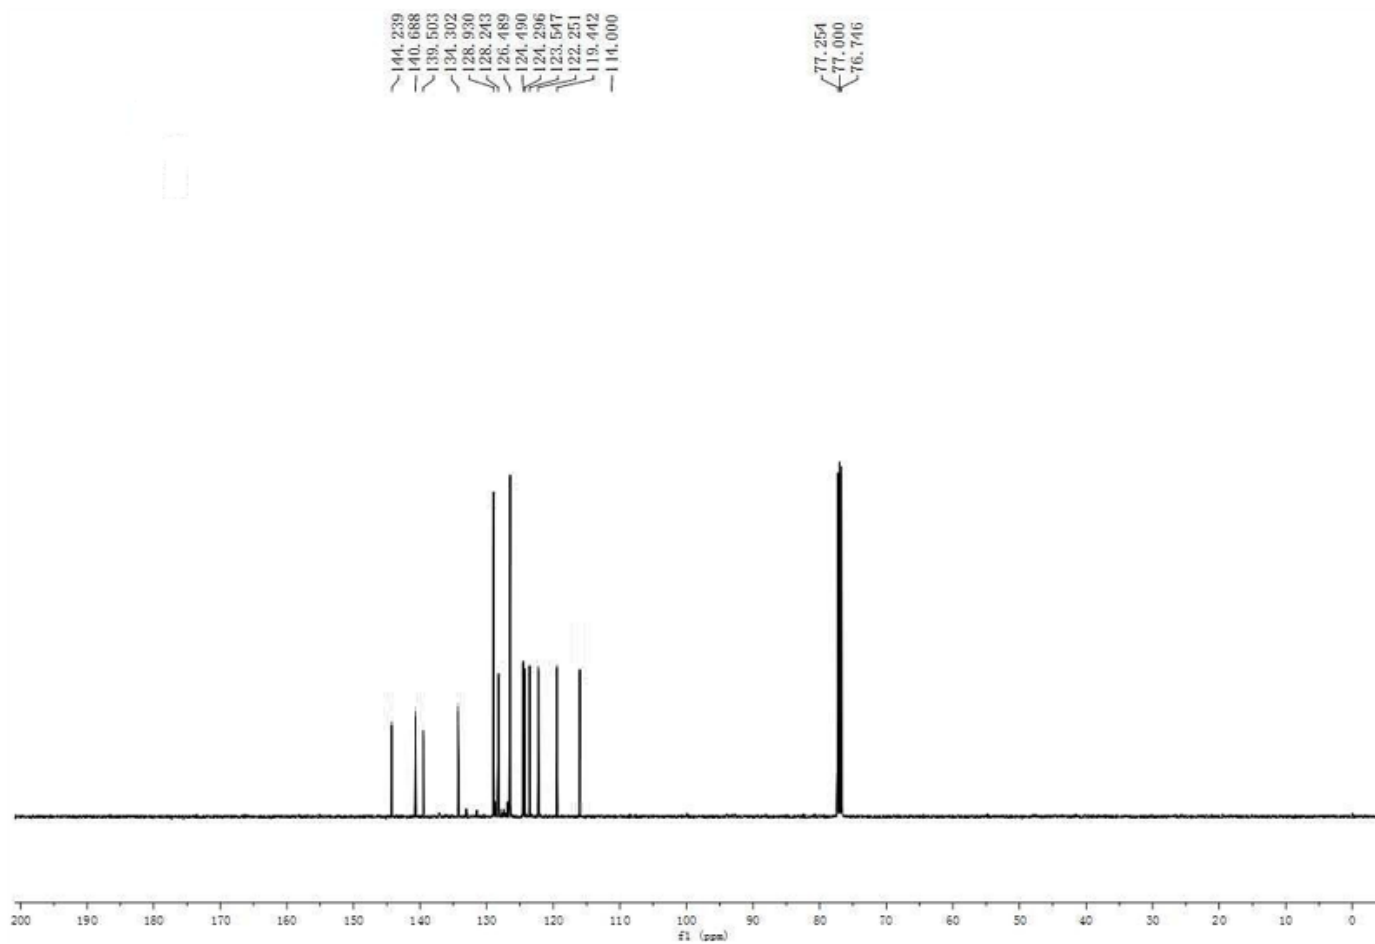

<sup>1</sup>H NMR of 3b

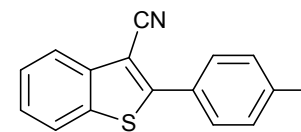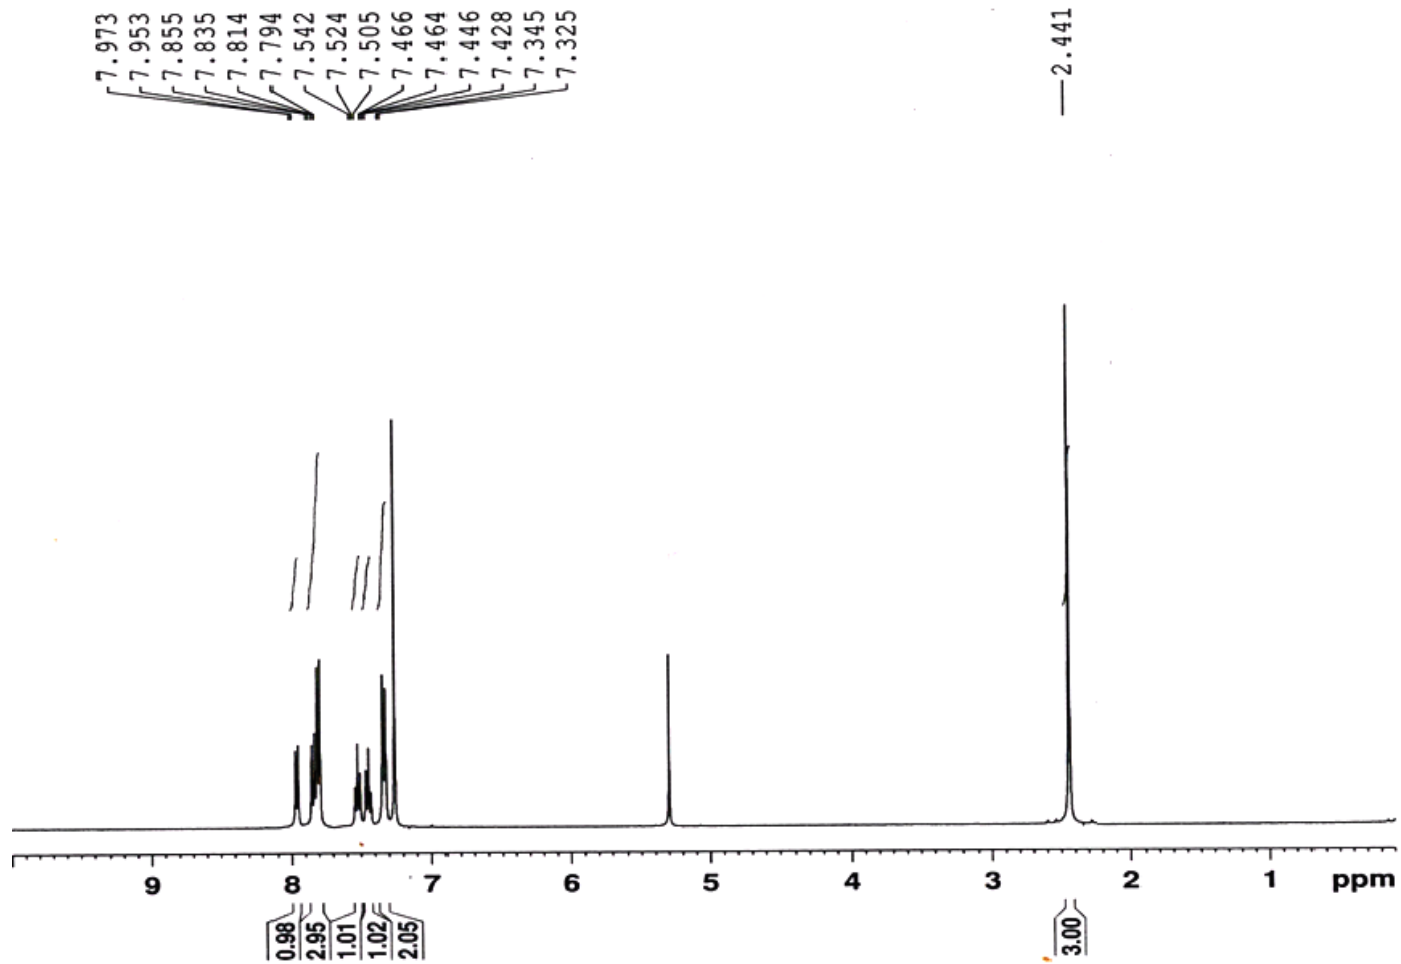

<sup>13</sup>C NMR of 3b

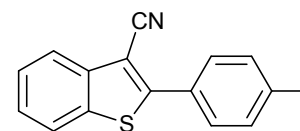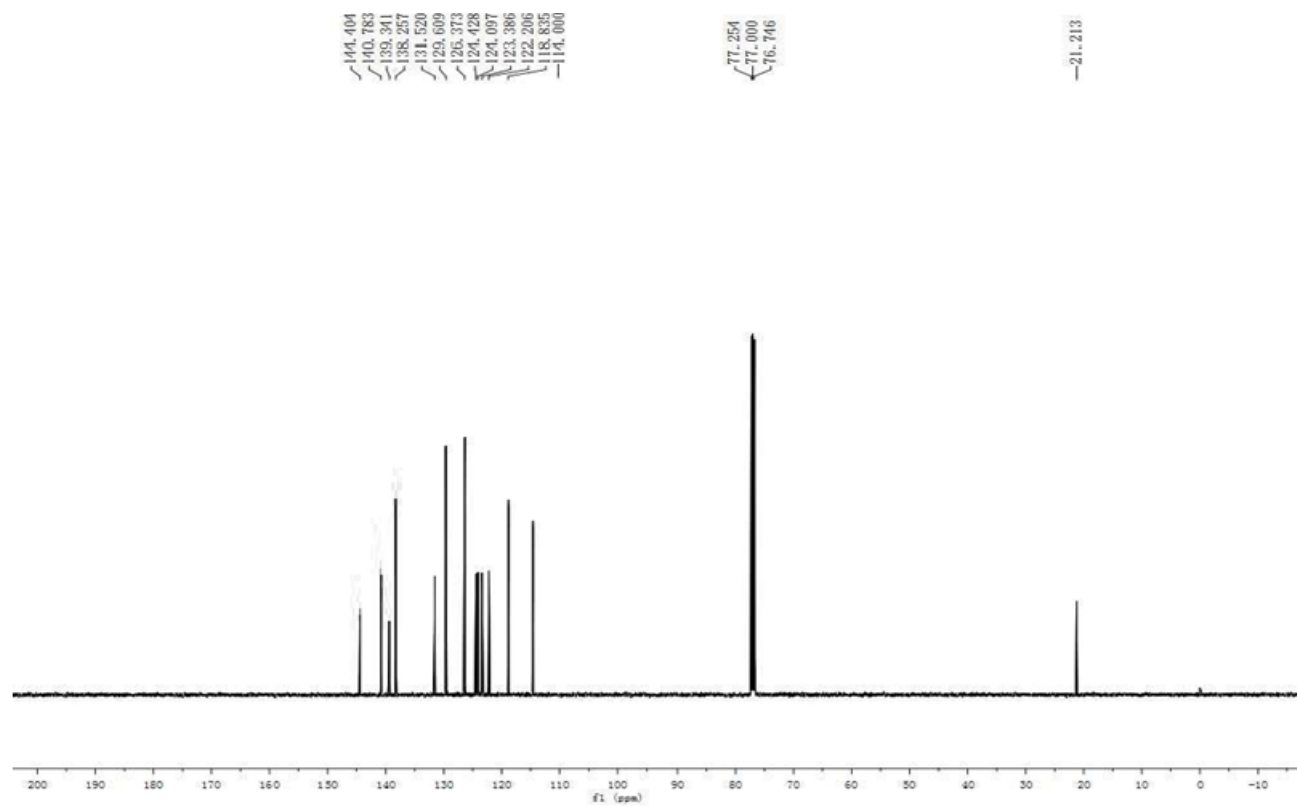

<sup>1</sup>H NMR of 3c

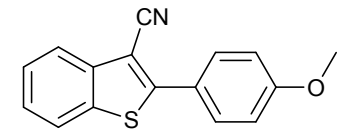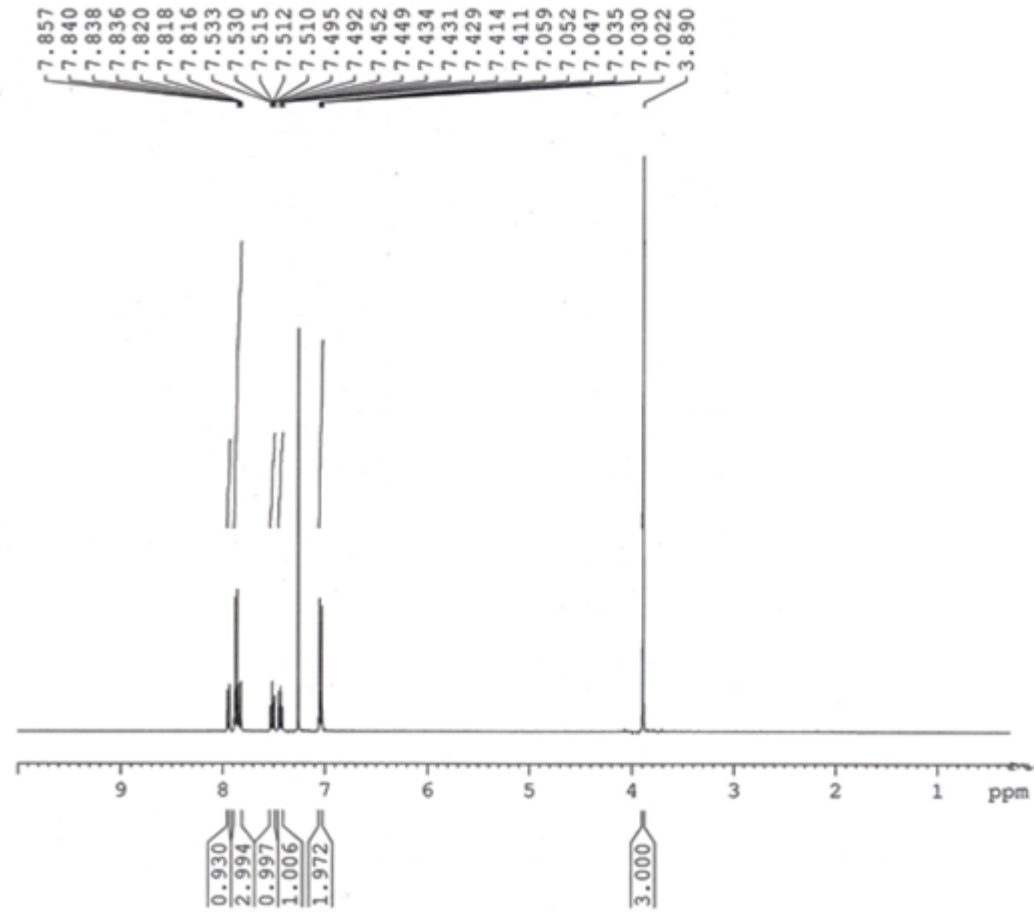

<sup>13</sup>C NMR of 3c

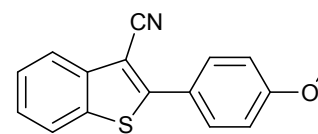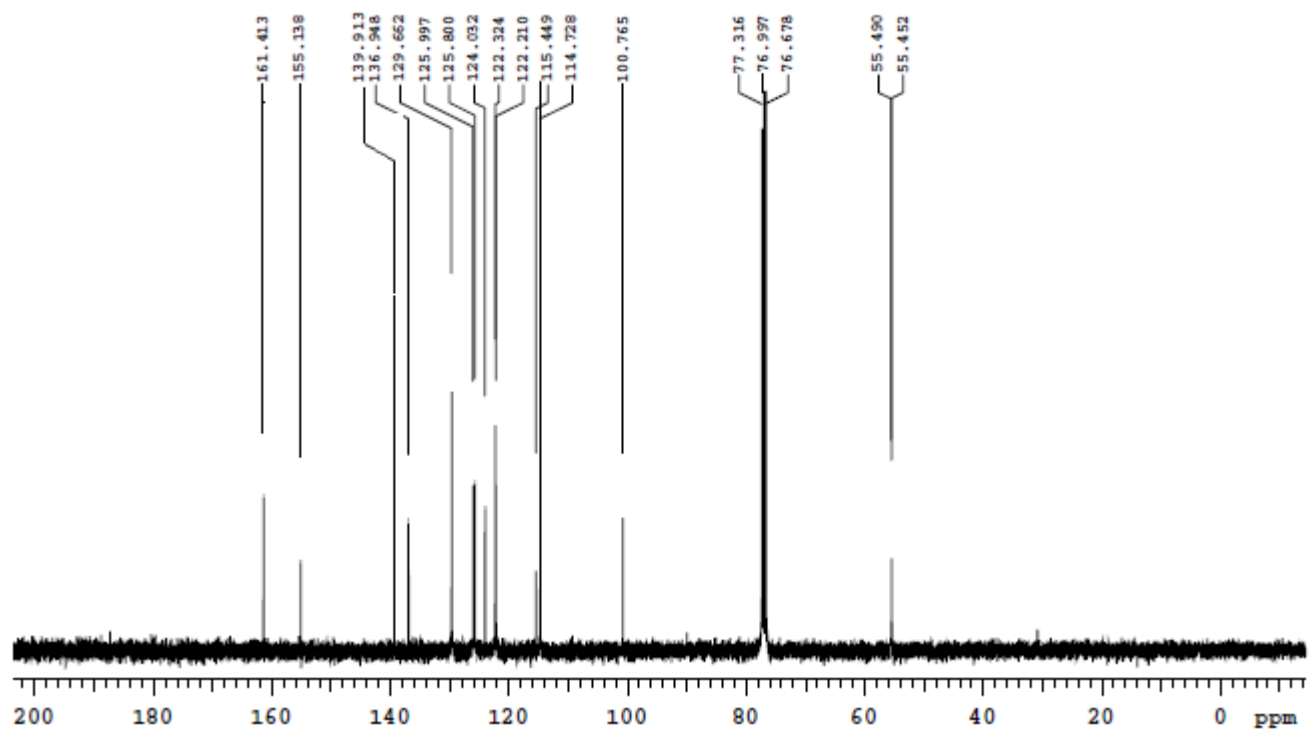

<sup>1</sup>H NMR of 3d

S7

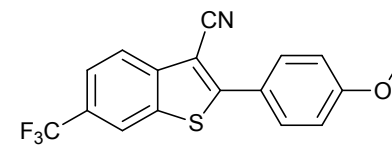

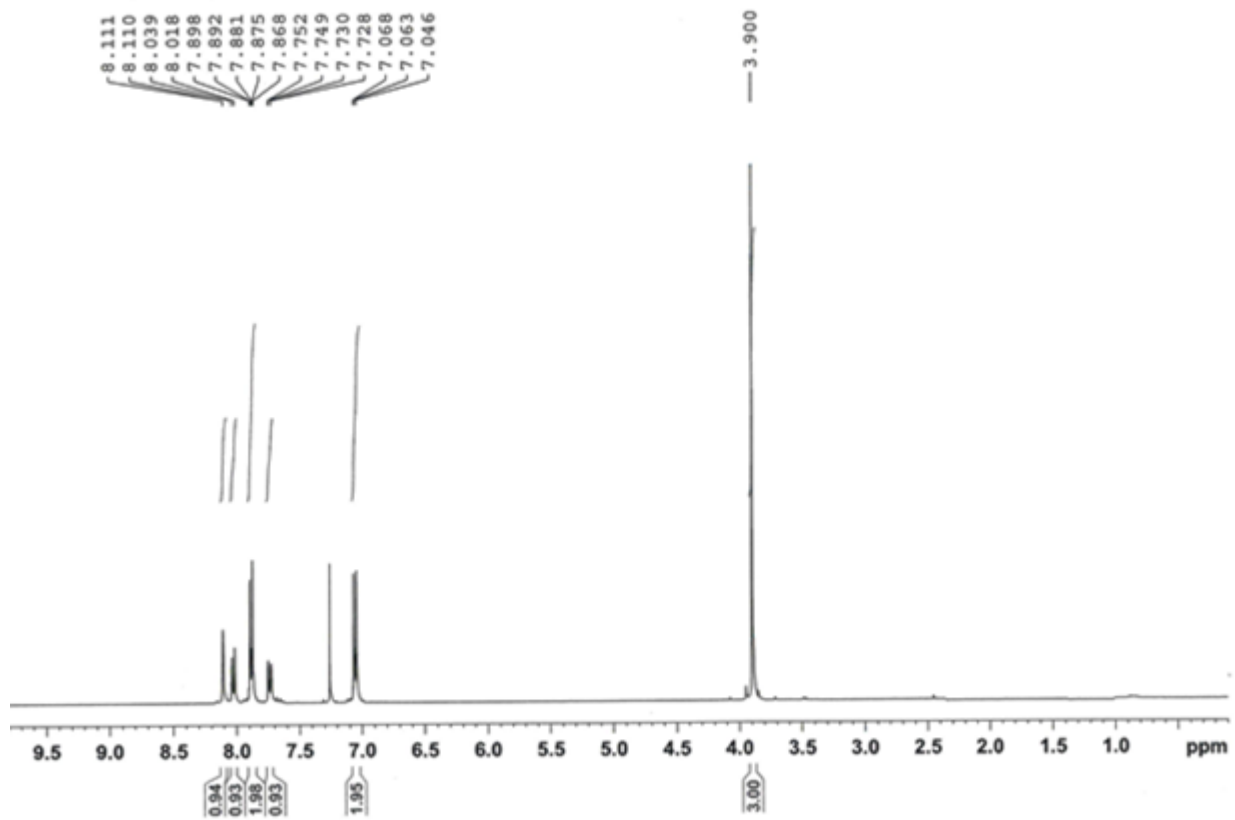

$^{13}\text{C}$  NMR of 3d

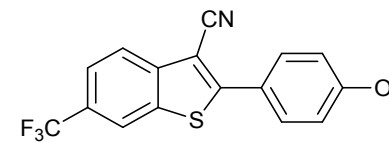



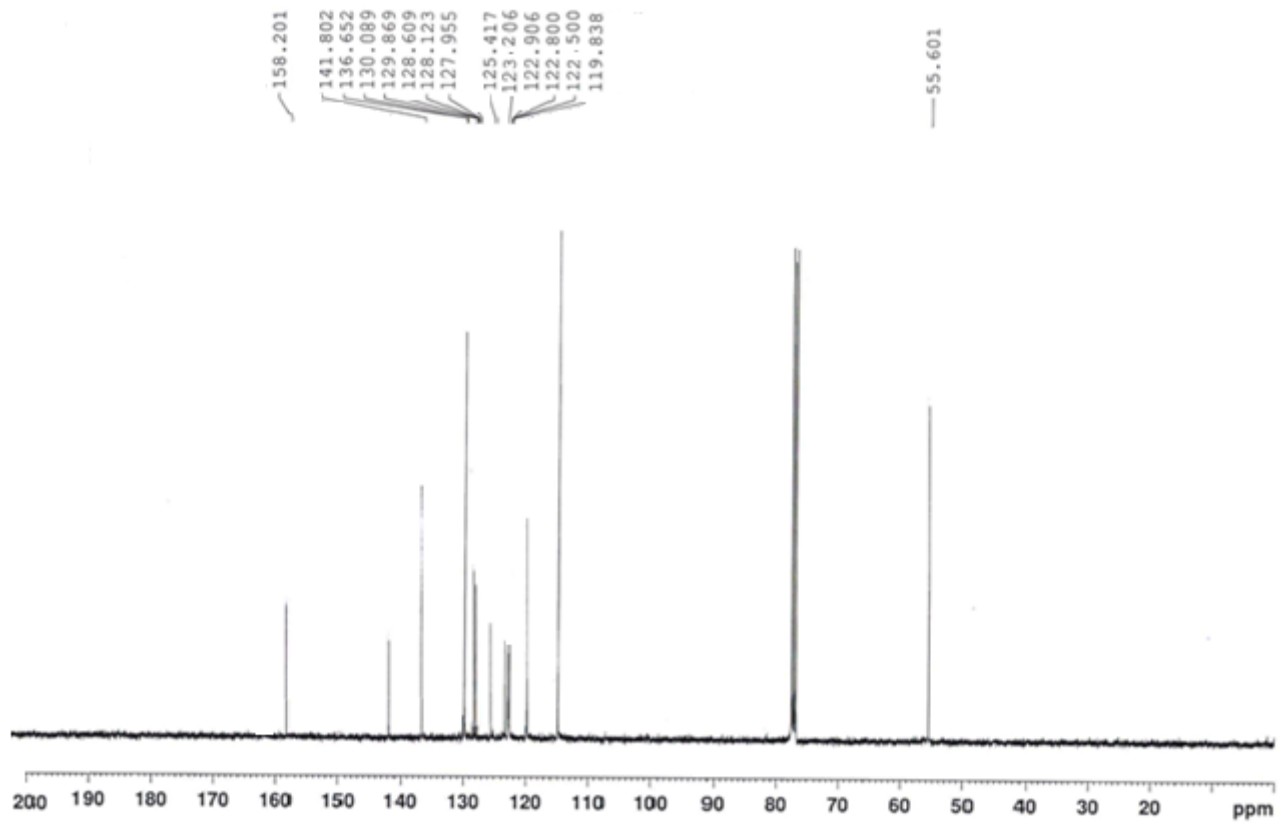

$^{13}\text{C}$  NMR of 3e

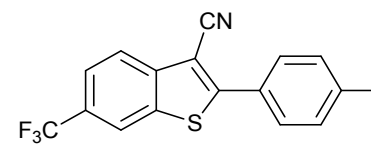

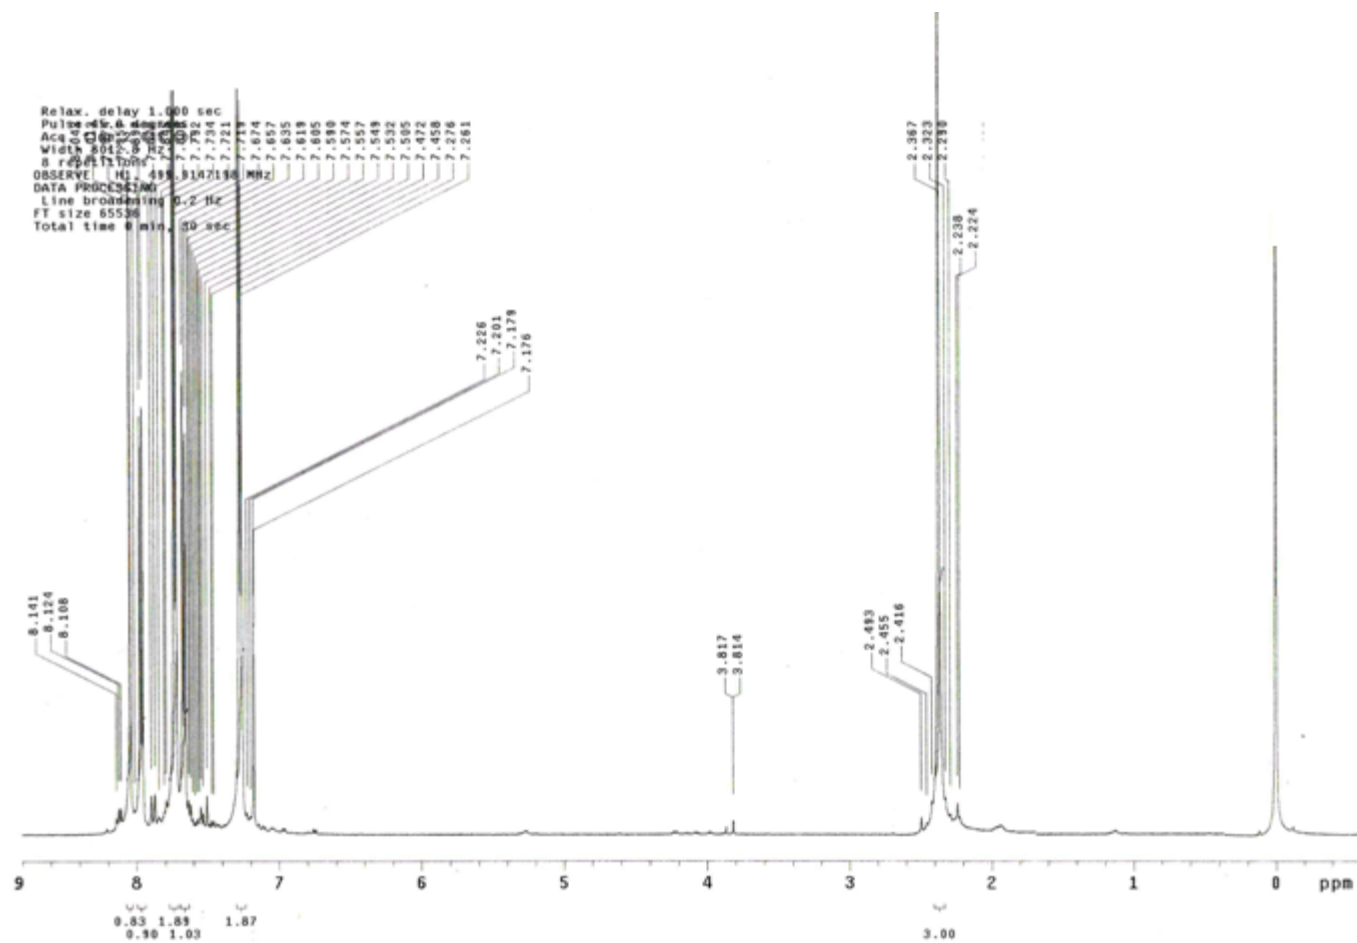

<sup>13</sup>C NMR of 3e

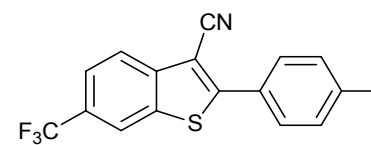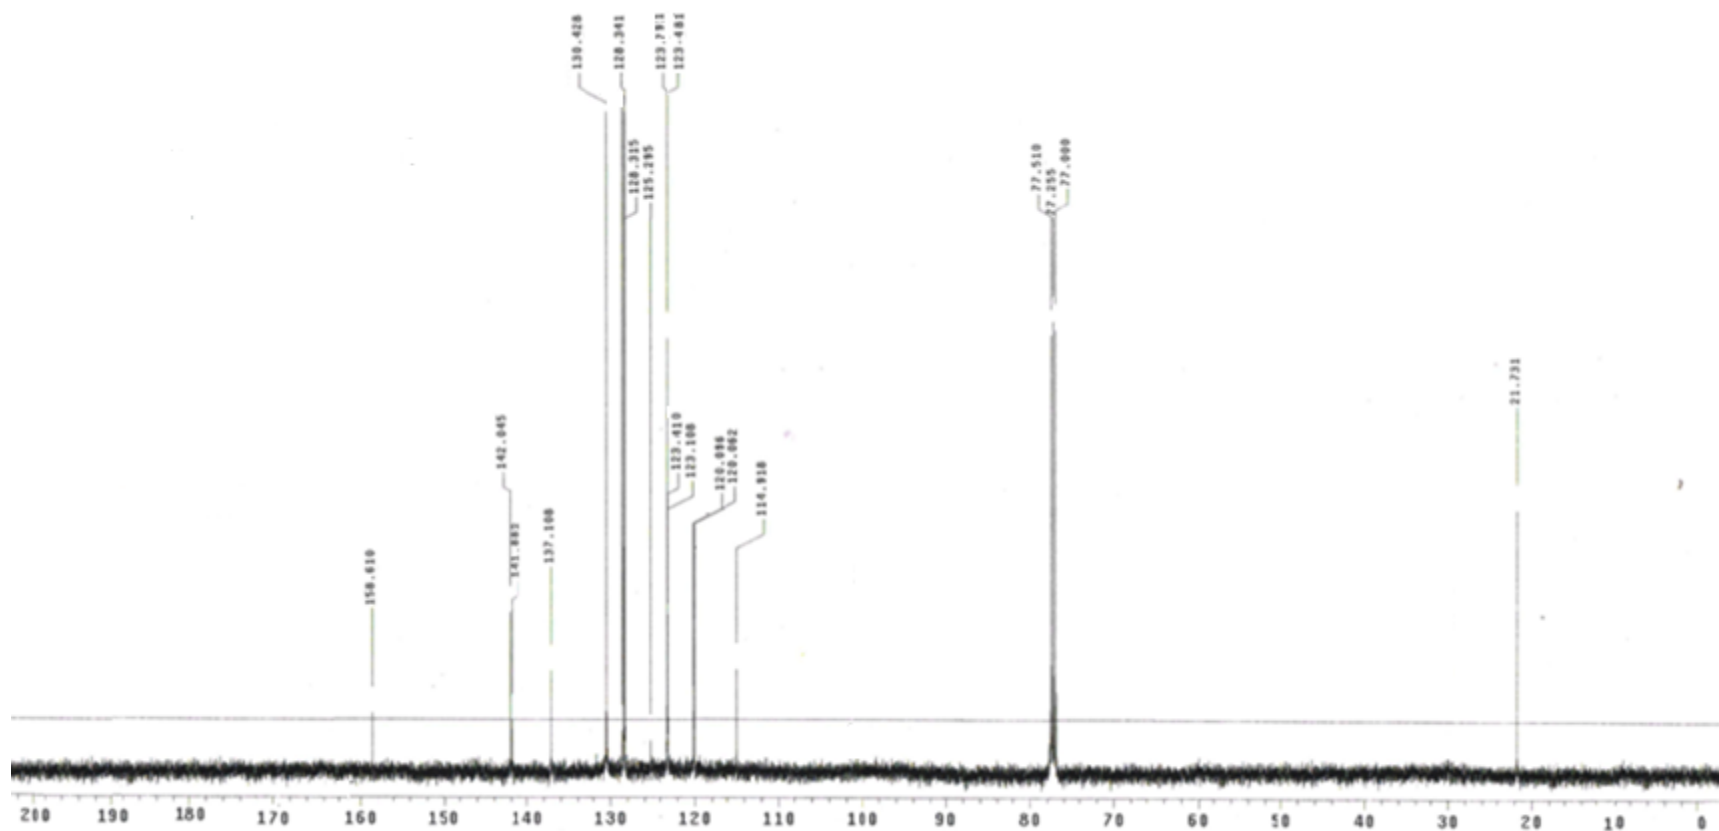

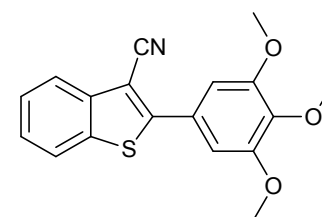

$^1\text{H}$  NMR of 3f

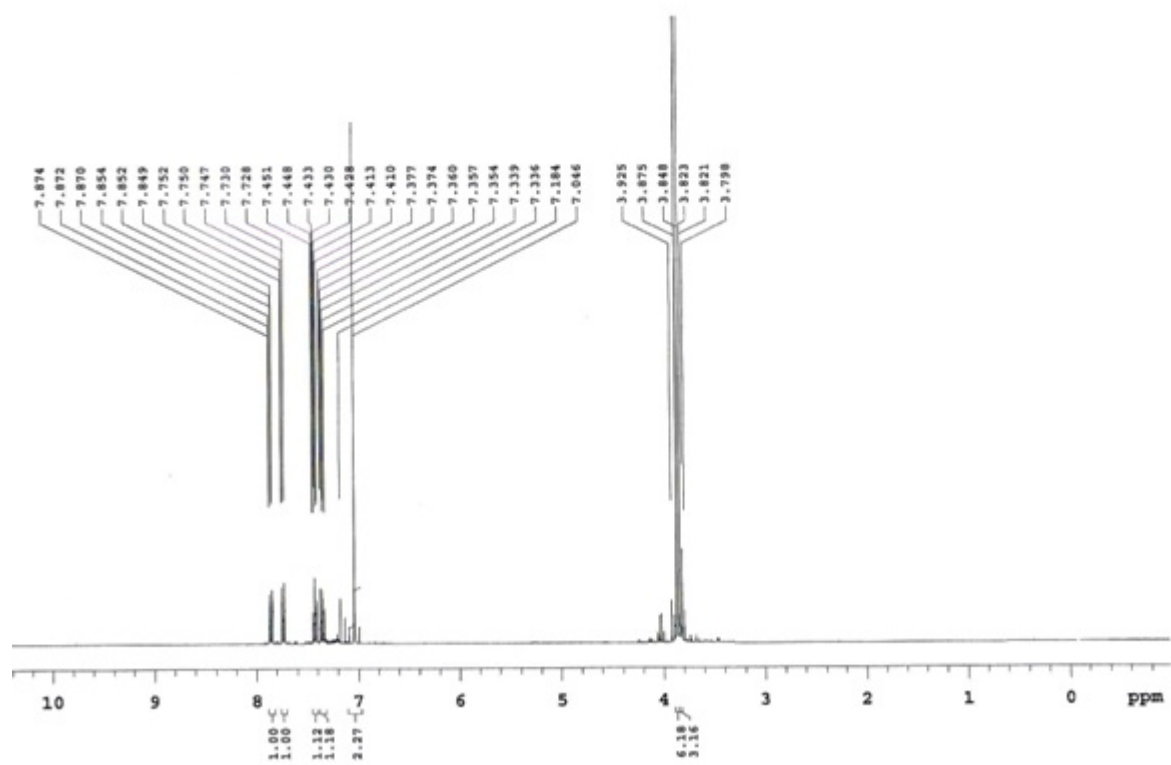

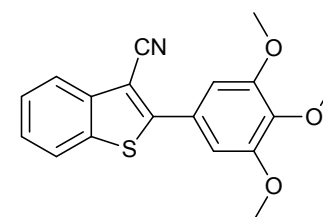

$^{13}\text{C}$  NMR of 3f

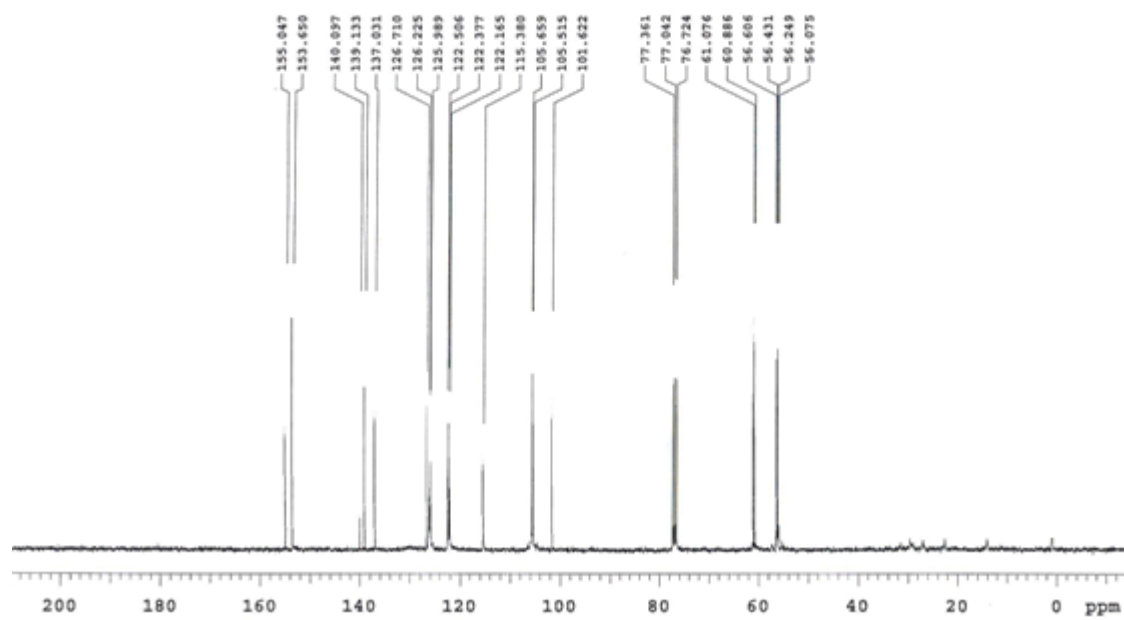

<sup>1</sup>H NMR of 3g

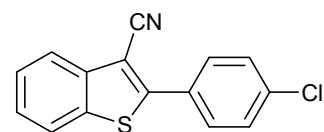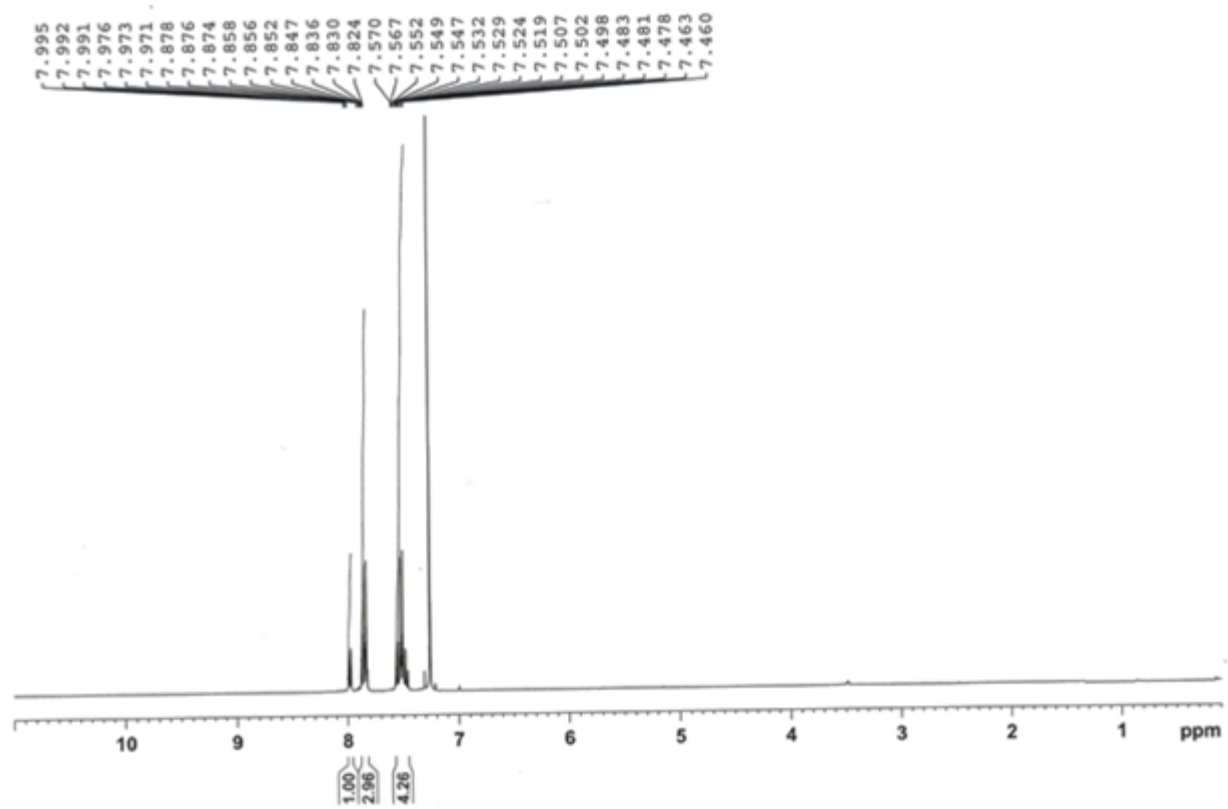

<sup>13</sup>C NMR of 3g

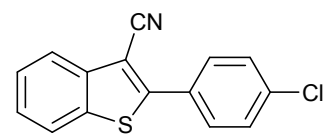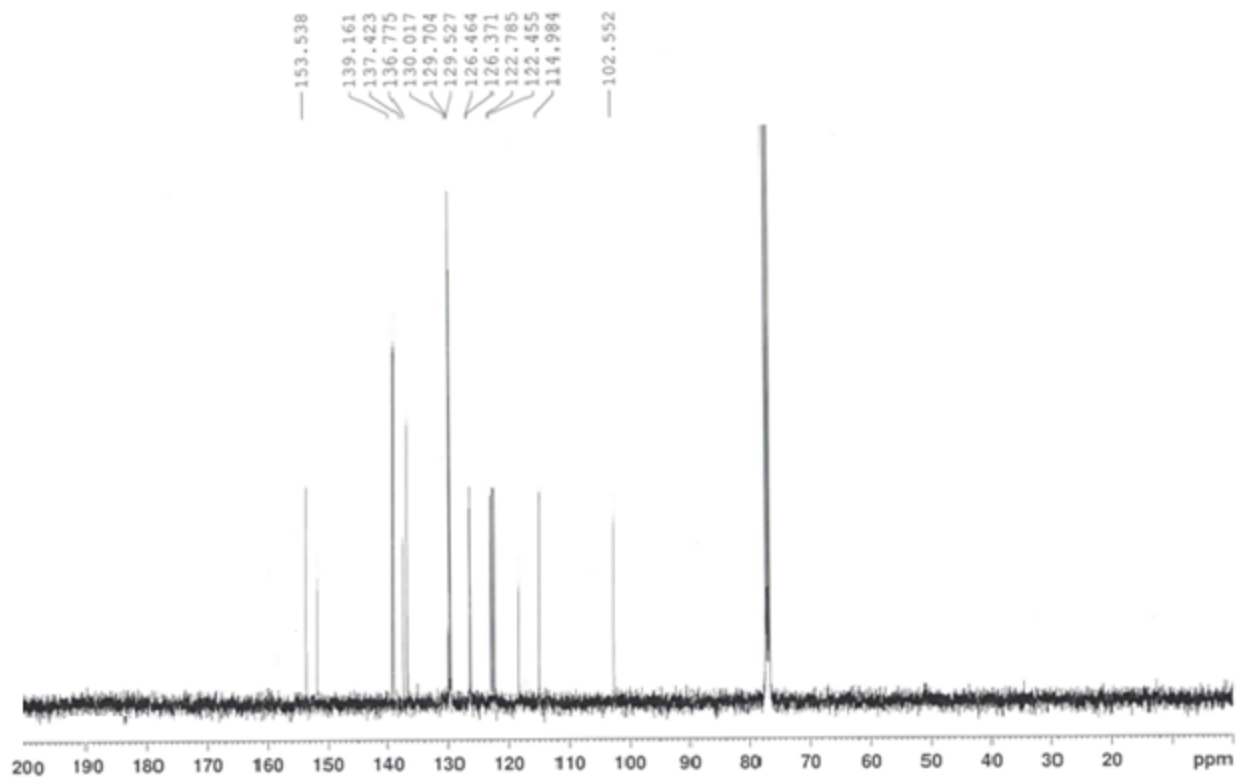

<sup>1</sup>H NMR of 3h

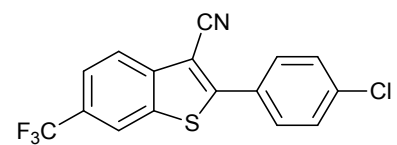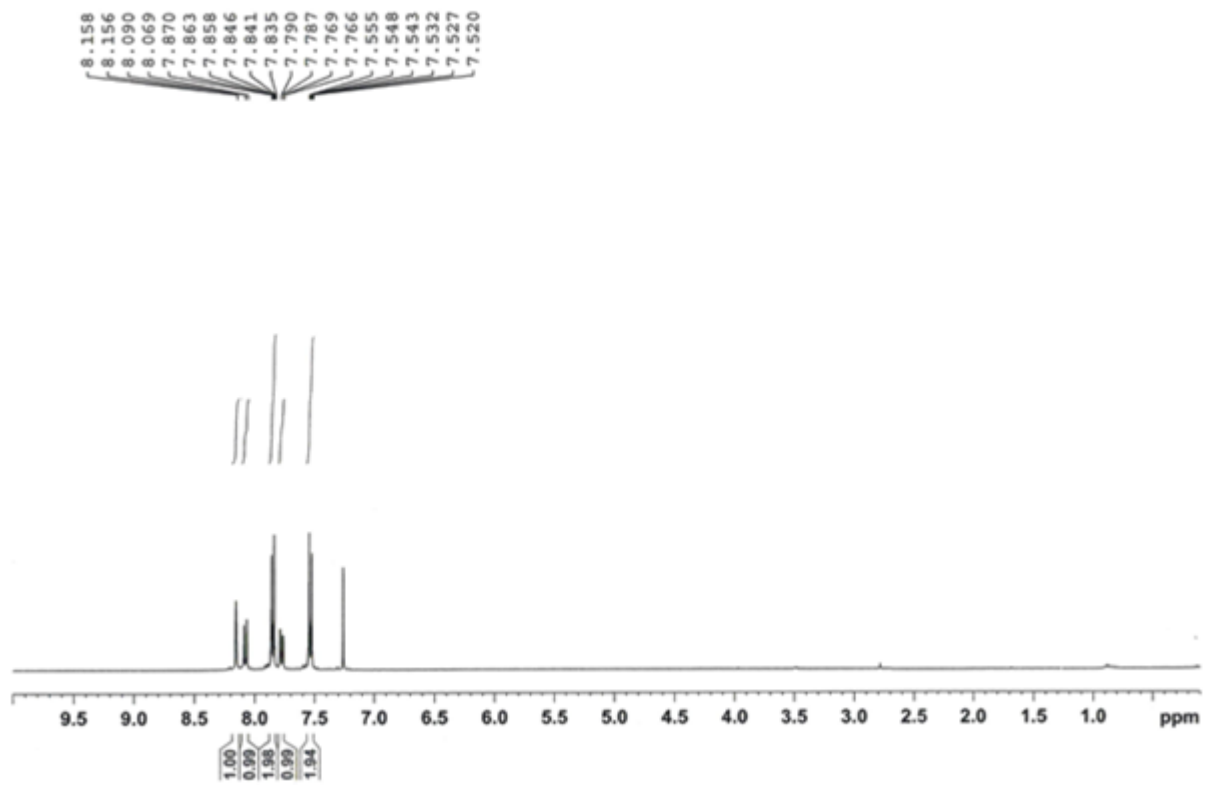



<sup>13</sup>C NMR of 3h

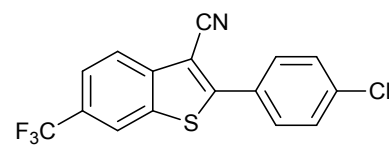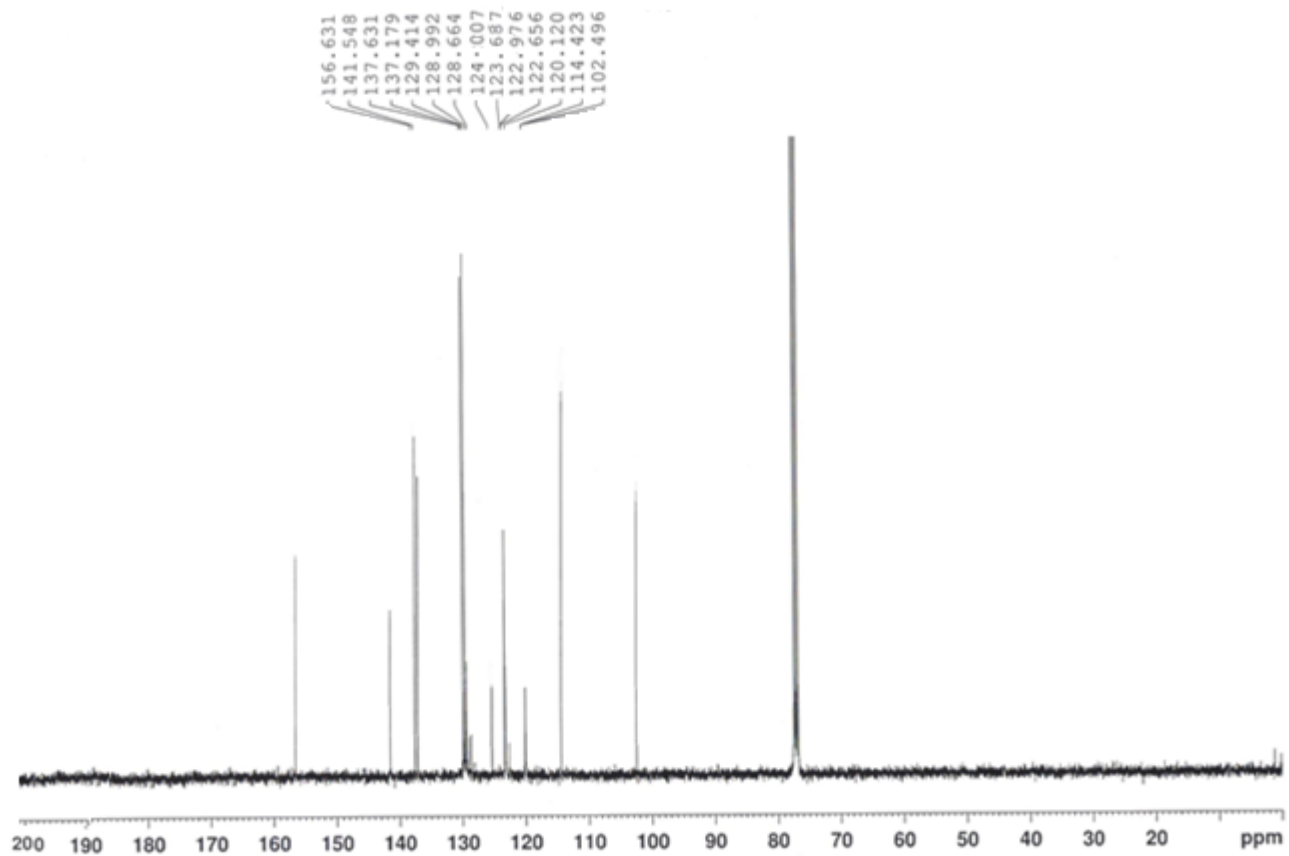

<sup>1</sup>H NMR of 3i

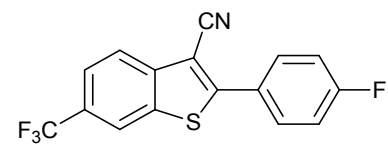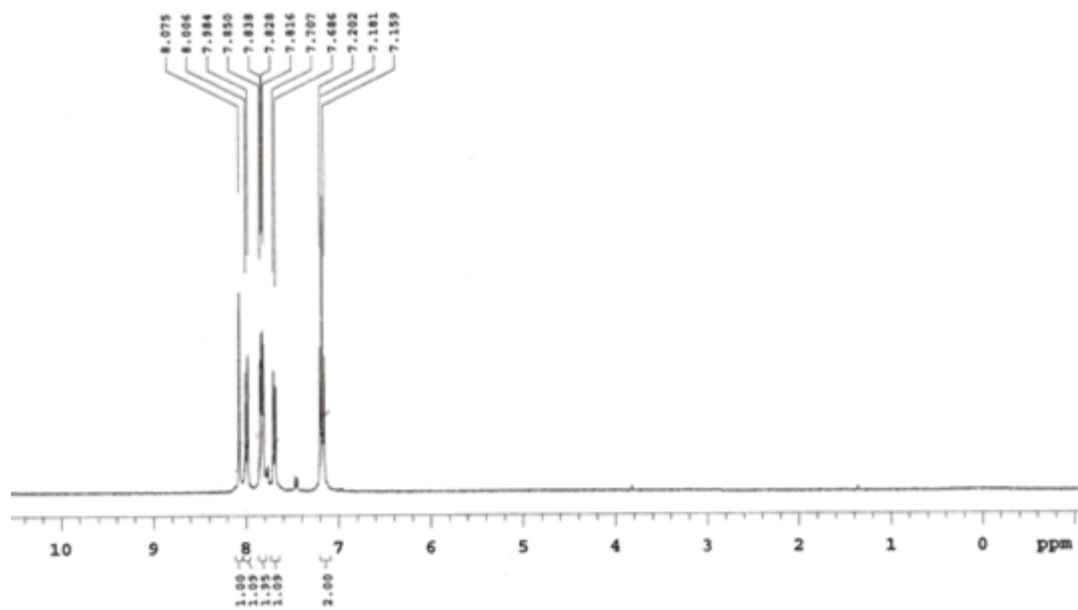

<sup>13</sup>C NMR of 3i

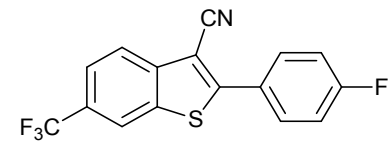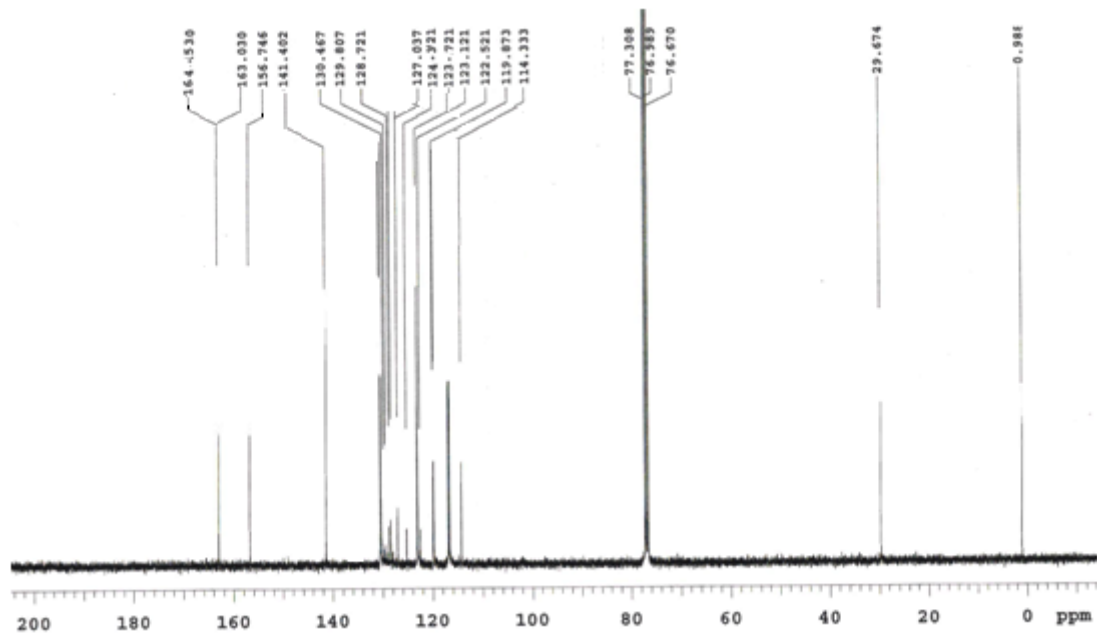

**<sup>1</sup>H NMR of 3j**

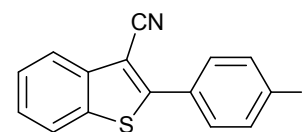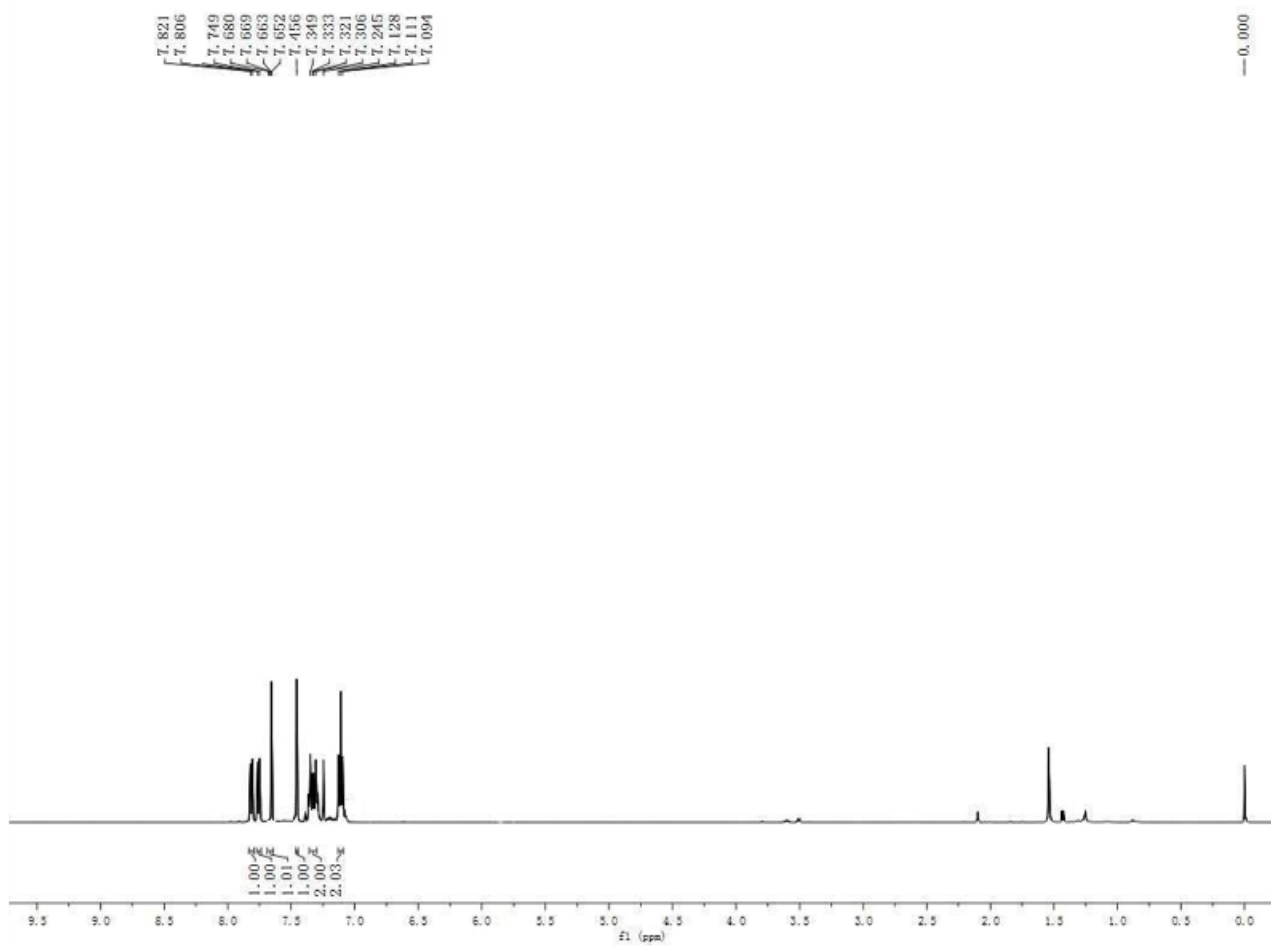

<sup>13</sup>C NMR of 3j

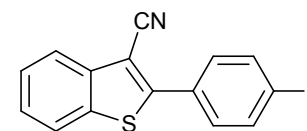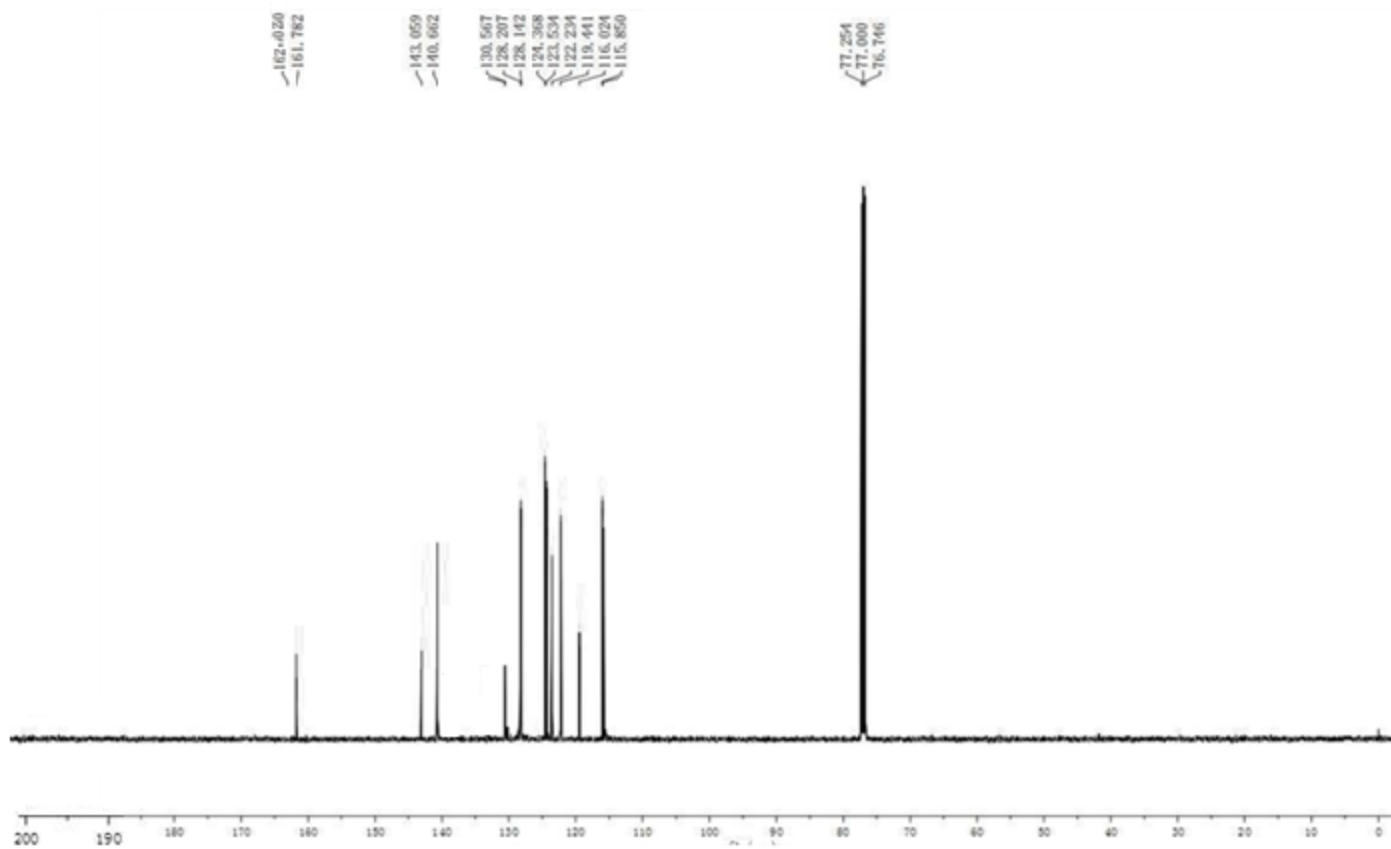

<sup>1</sup>H NMR of 3k

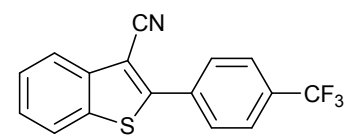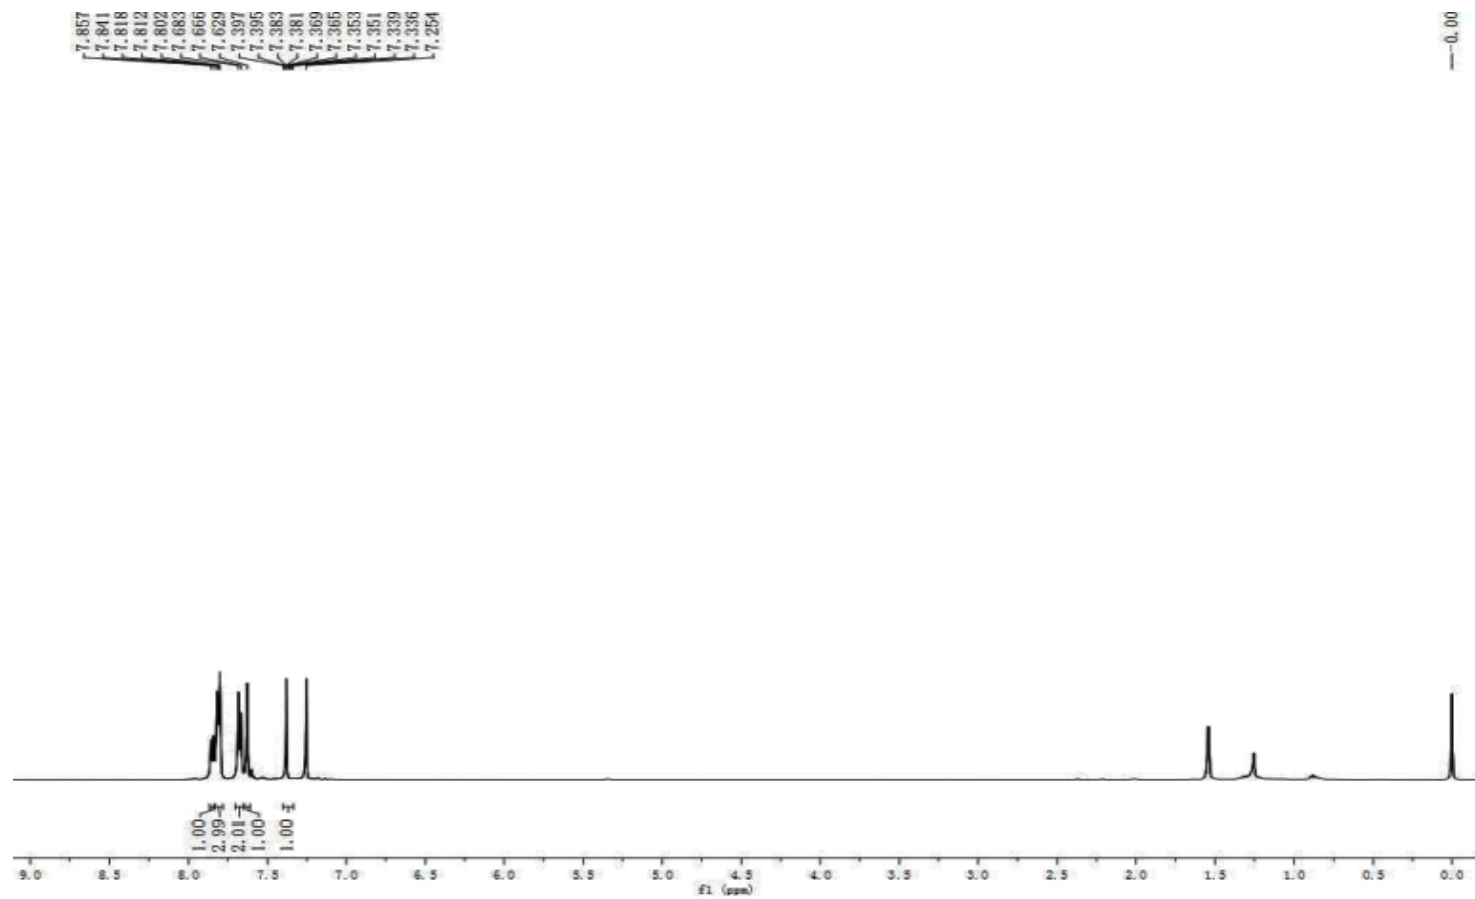

<sup>13</sup>C NMR of 3k

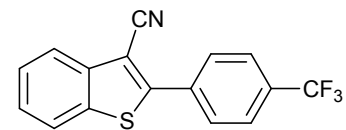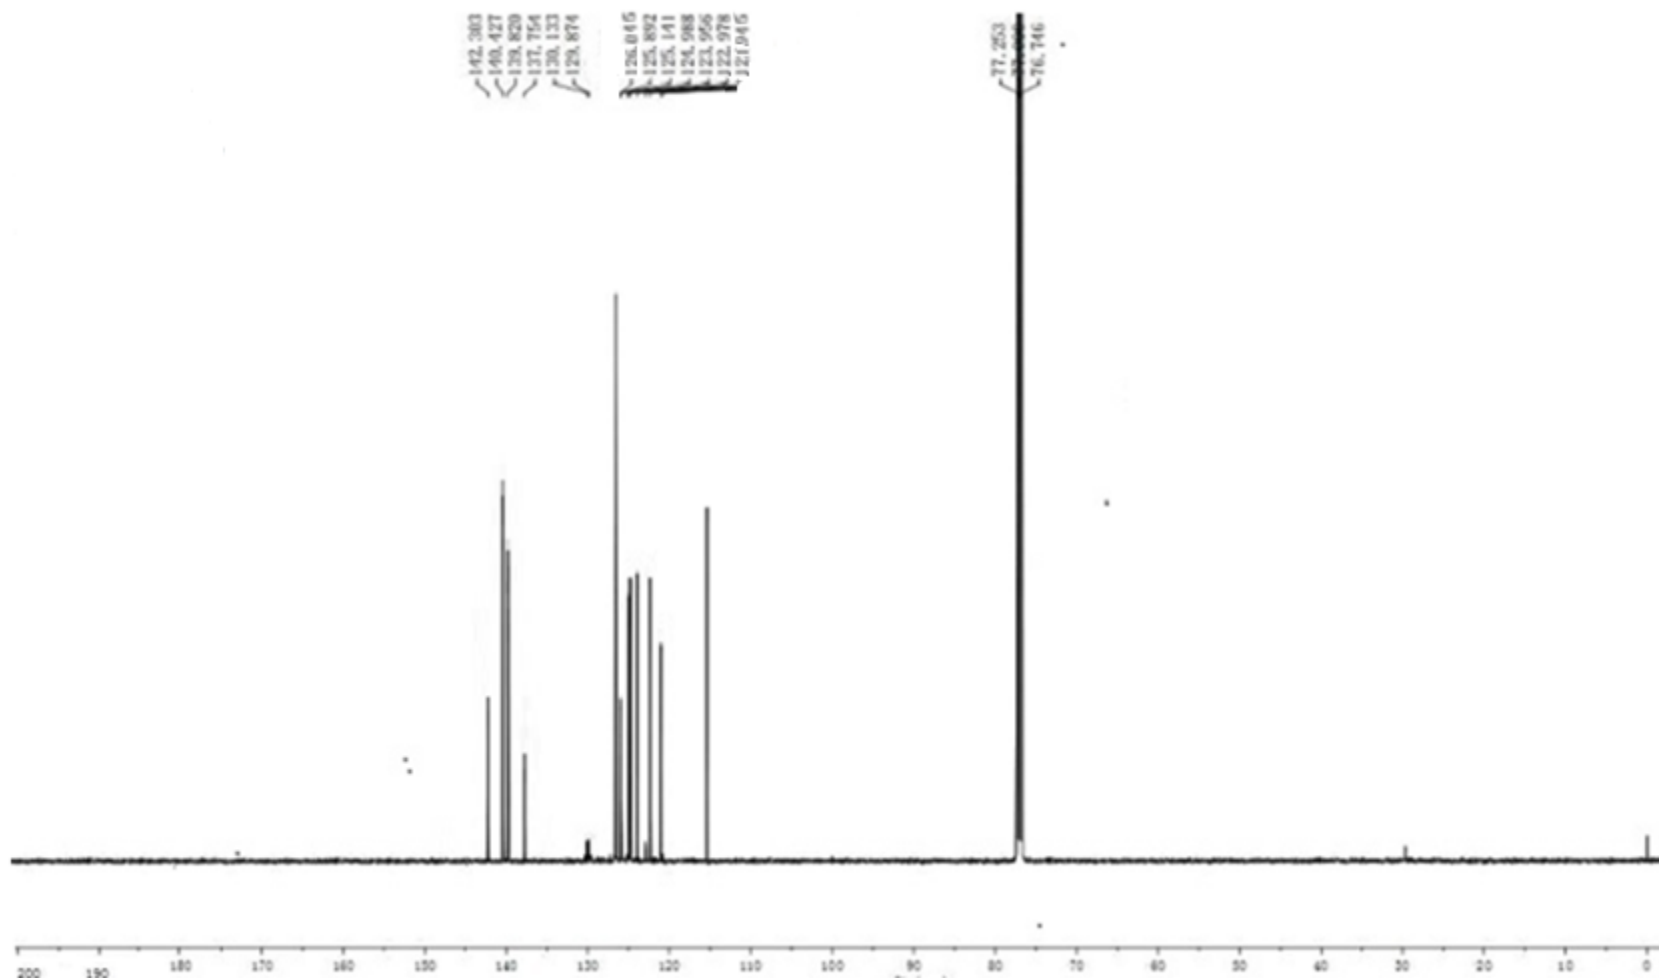

<sup>1</sup>H NMR of 3l

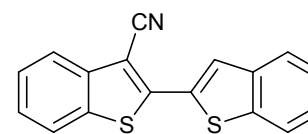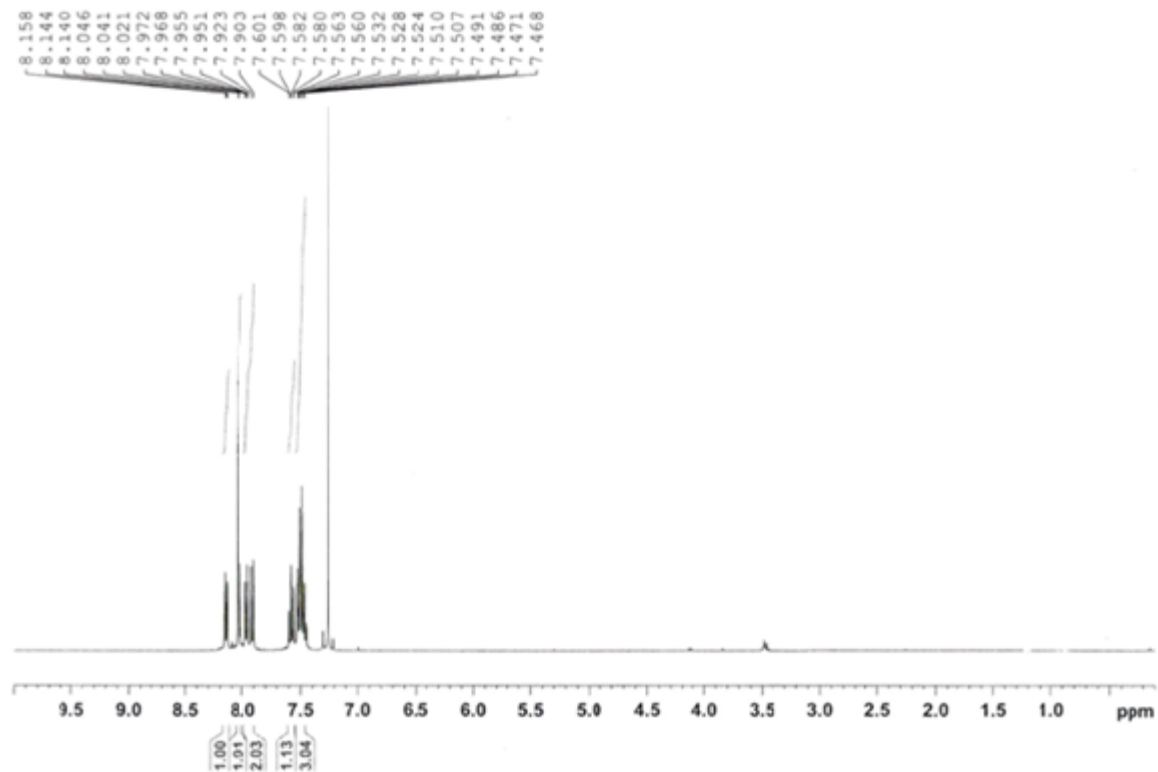



<sup>13</sup>C NMR of 3I

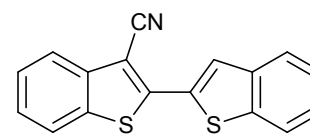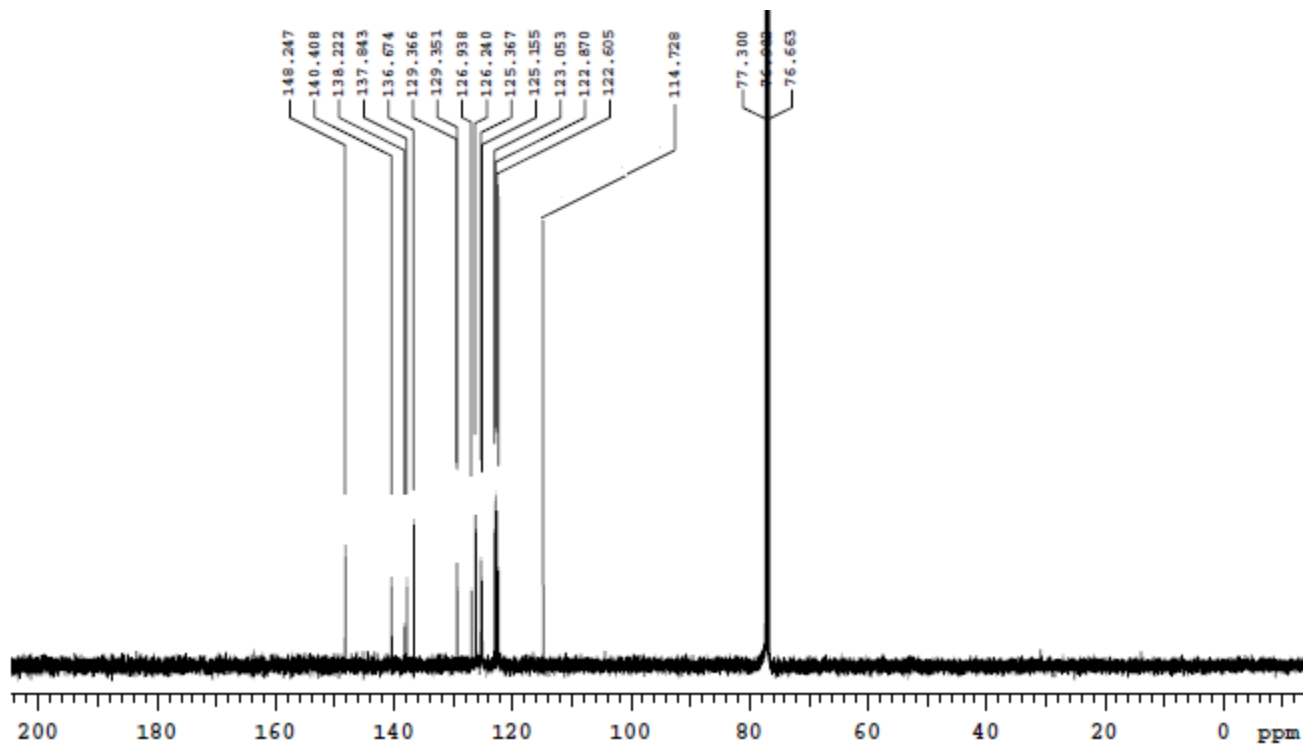

<sup>1</sup>H NMR of 3m

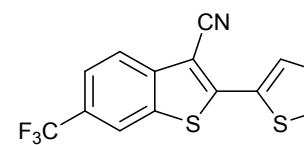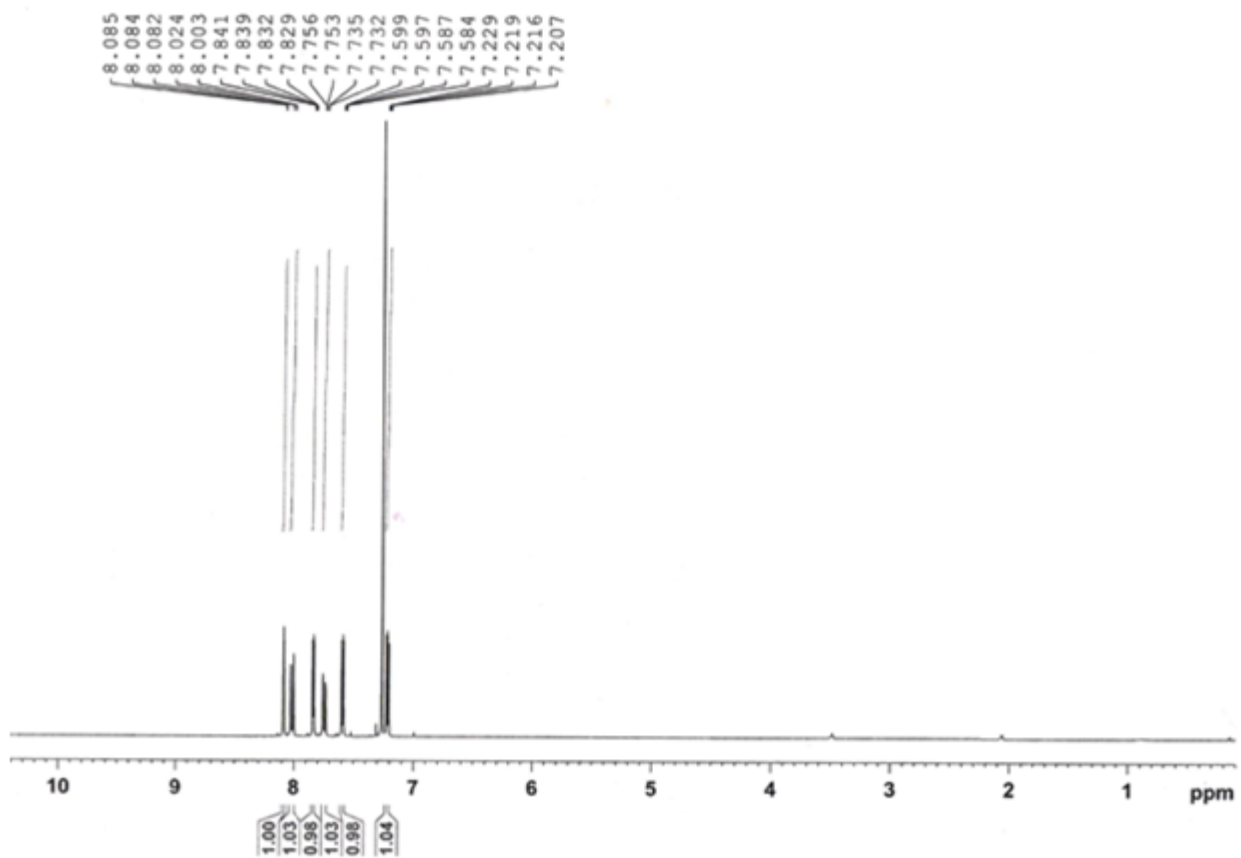

<sup>13</sup>C NMR of 3m

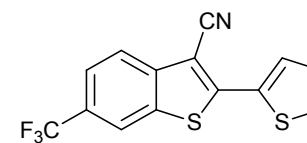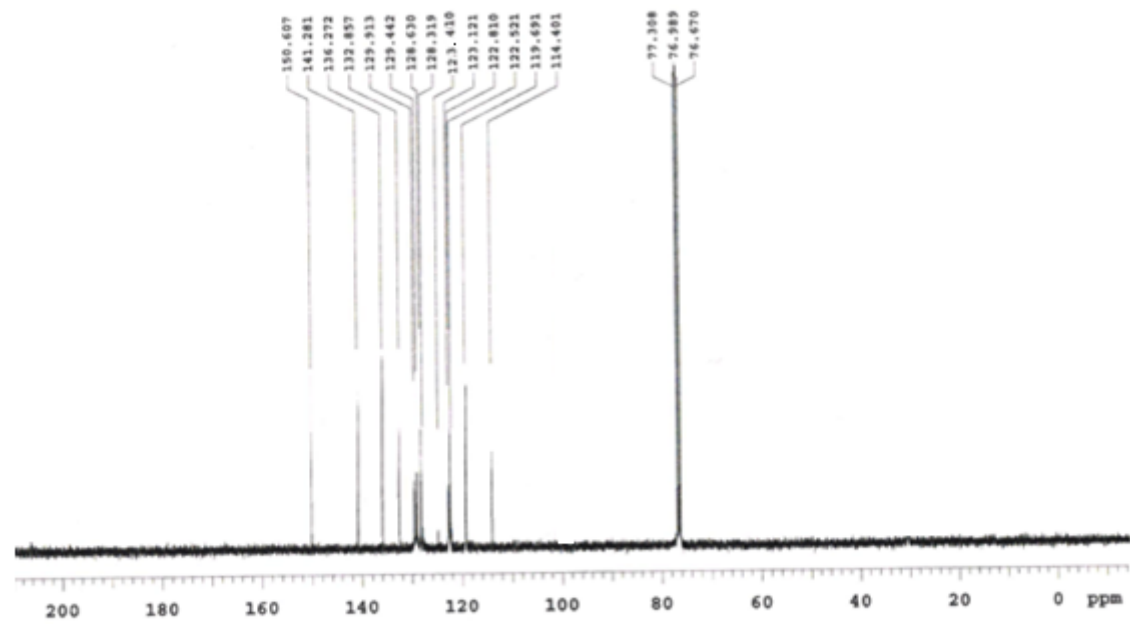

**<sup>1</sup>H NMR of 3n**

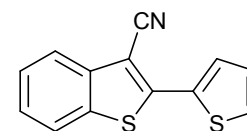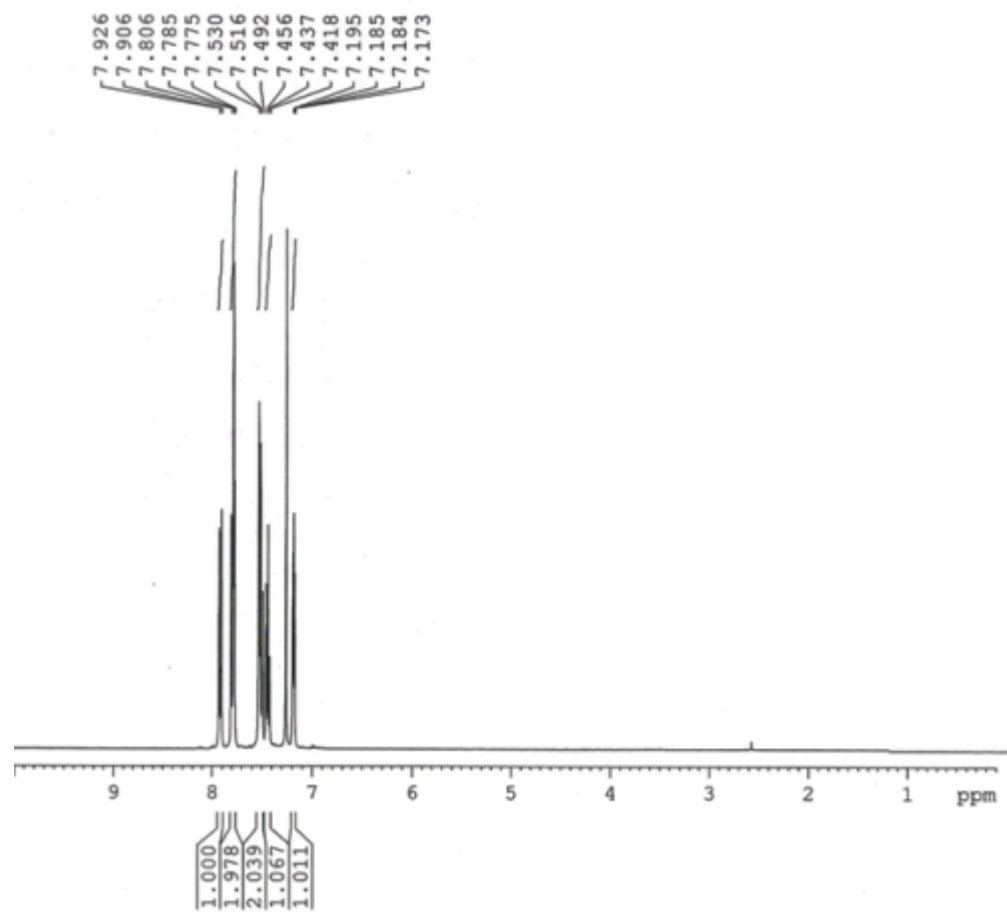

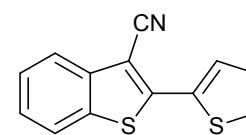

$^{13}\text{C}$  NMR of 3n

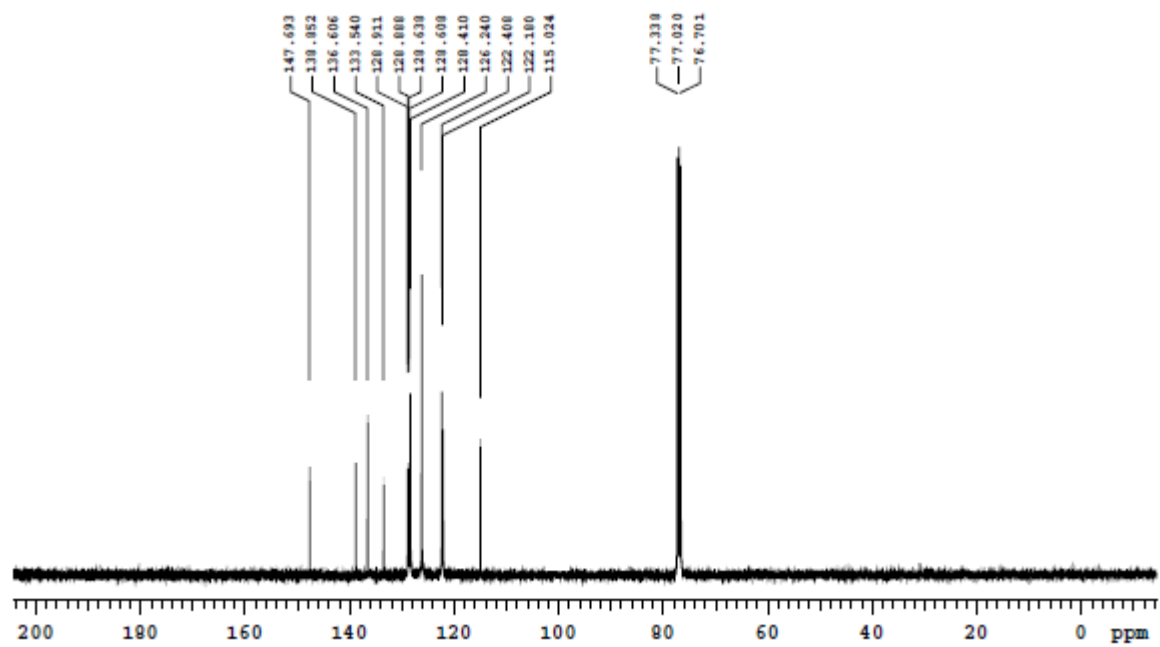

<sup>1</sup>H NMR of 3o

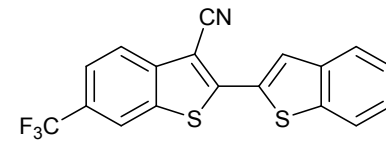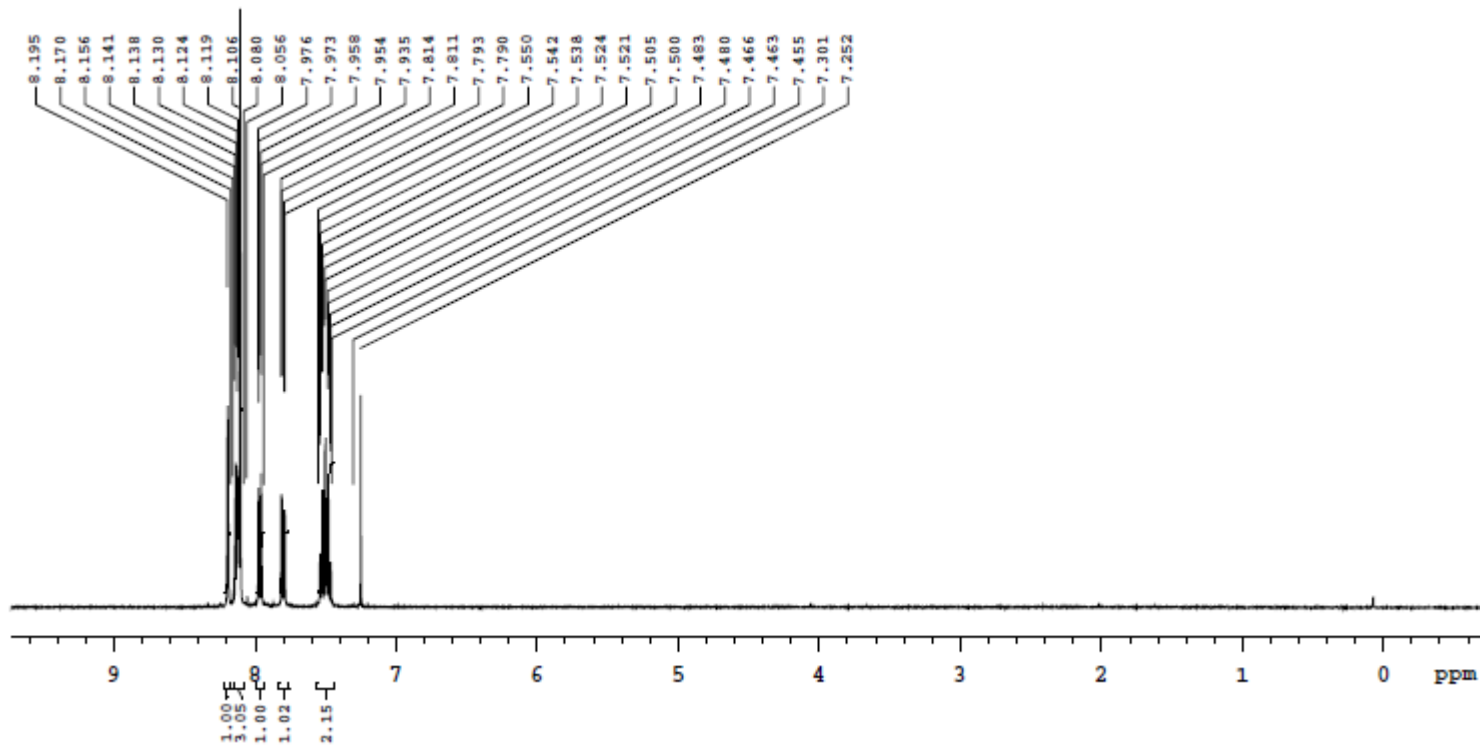

<sup>13</sup>C NMR of 3o

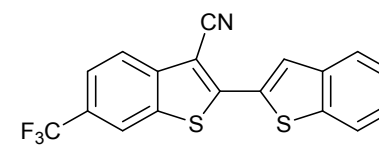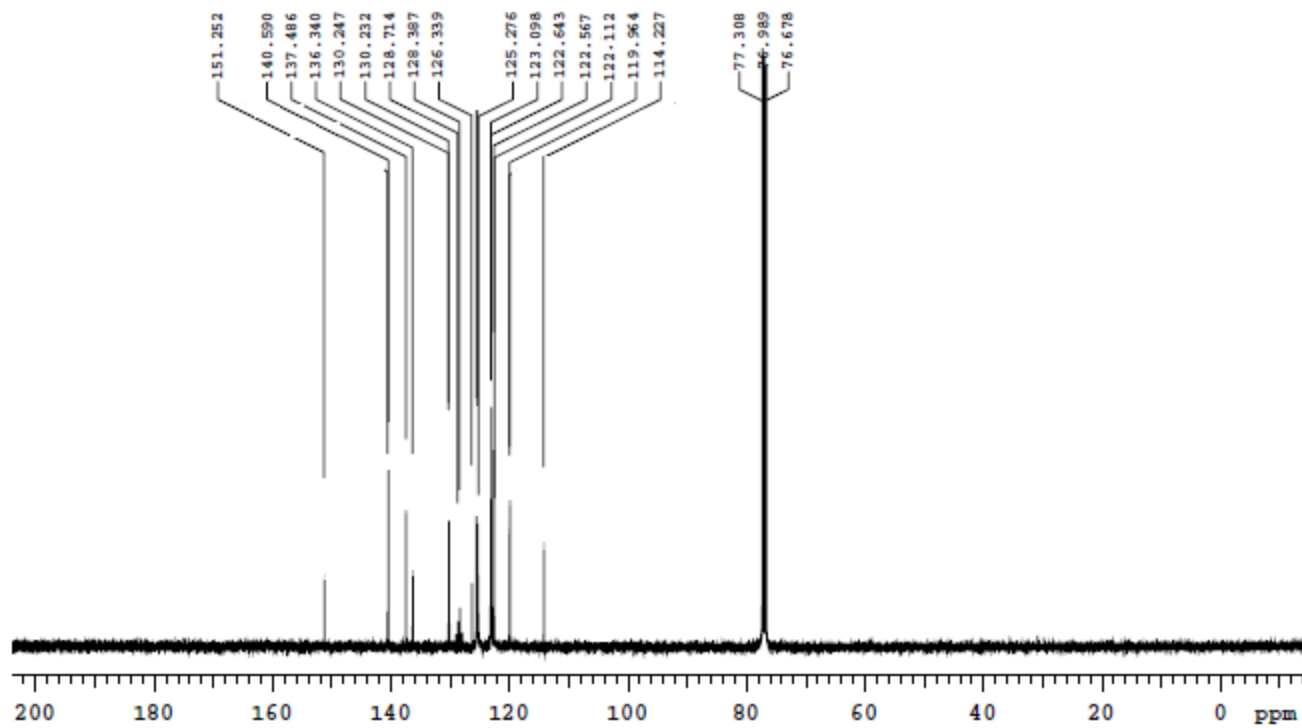





<sup>13</sup>C NMR of 3p

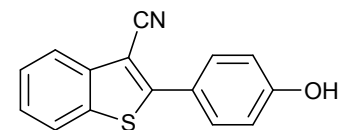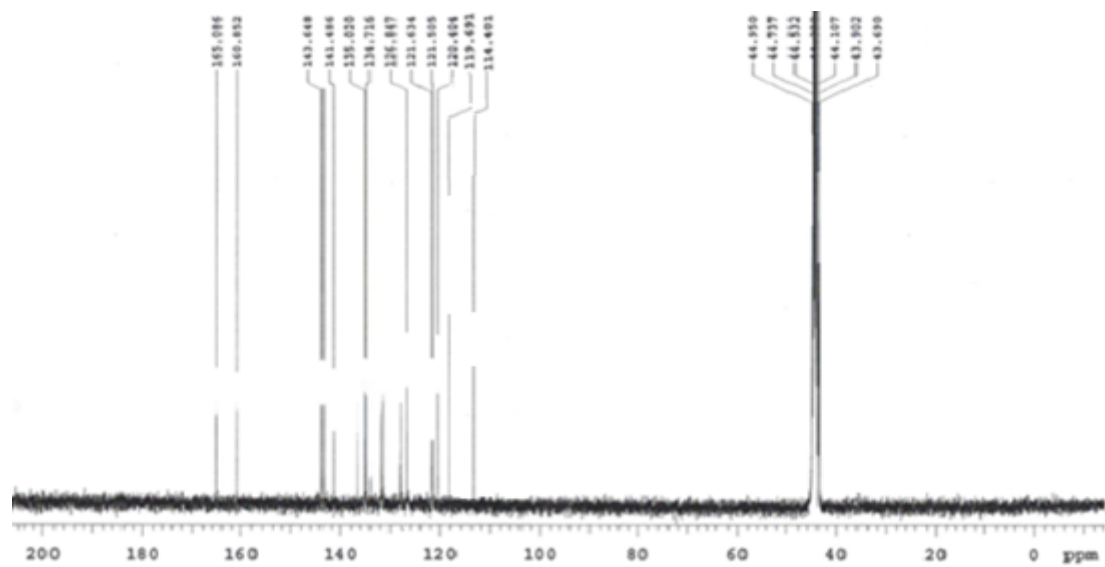

Supplement: c5ra02114f1.pdf [file c5ra02114f1.pdf]
